# Supplementary material for: Core–shell Au/CeO2 nanoparticles supported in UiO-66 beads exhibiting full CO conversion at 100 °C
Source: Royal Society of Chemistry journal article supplement (doi:10.1039/c7ta03006a), 2017-01-01
Supplement: c7ta03006a1.pdf [file c7ta03006a1.pdf]

## **Supplementary Information**

### **Core-shell Au/CeO<sub>2</sub> nanoparticles supported in UiO-66 beads exhibiting full CO conversion at 100 °C**

A. Yazdi, A. Abo Markeb, L. Garzon-Tovar J. Patarroyo , J. Moral-Vico, A. Alonso, A. Sánchez, N. G. Bastús, I. Imaz, X. Font, V. Puentes and D. Maspoch

## Experimental details

### Materials

All reagents were purchased from Sigma-Aldrich and used without further purification. All gases were purchased from Carburros Metálicos. Deionized water, obtained with a Milli-Q system (18.2 MQ cm), was used in all reactions.

### Synthesis of PVP-Stabilized Au/CeO<sub>2</sub> Nanoparticles

Au/CeO<sub>2</sub> (Ce:Au = 1:1) NPs were synthesized in water following the simultaneous reduction/oxidation of Au and Ce precursors (N. Bastus, J. Patarroyo, J. Piella, V. Puentes, work submitted). More specifically, 400 ml of an aqueous solution containing sodium citrate (10 mM) was prepared and heated with a heating mantle in a three-neck round-bottomed flask for 15 minutes under vigorous stirring. A condenser was used to prevent the evaporation of the solvent. After boiling had commenced, HAuCl<sub>4</sub> (25 mM) and cerium (III) nitrate hexahydrate (25 mM) were sequentially injected to this solution. After cooling down to room temperature, 4 g of poly(vinylpyrrolidone) (PVP, M.W 10,000) in 200 ml of water was added dropwise to the NP solution while stirring and left overnight at room temperature. Then, 800 ml of acetone was added to the NP solution and left 24 hours at room temperature without stirring for precipitation of the NPs. After removing the supernatant, NPs were washed three times with DMF and finally, redispersed in DMF to give a colloidal solution of Au/CeO<sub>2</sub> NPs with a concentration of 1 mg/ml. The average size of synthesized Au/CeO<sub>2</sub> NPs was 12 ± 2.5 nm.

### Synthesis of UiO-66@Au/CeO<sub>2</sub>

100 mg of terephthalic acid (BDC), 3 ml of acetic acid, a volume of Au/CeO<sub>2</sub> NPs (concentration = 1 mg/ml; 4 ml for UiO-66@Au/CeO<sub>2</sub>-2.8; 8.5 ml for UiO-66@Au/CeO<sub>2</sub>-5.5; and 12.5 ml for UiO-66@Au/CeO<sub>2</sub>-7) and 280 µl of Zr(OPr<sup>n</sup>)<sub>4</sub> were sequentially mixed in 40 ml DMF. These solutions were injected into a coil flow reactor (inner diameter: 3 mm) at a feed rate of 2.4 ml.min<sup>-1</sup> at 115° C. The resulting pre-heated solution was then spray dried at 180° C and a flow rate of 336 ml.min<sup>-1</sup> using a B-290 Mini Spray Dryer (BUCHI Labortechnik) using a spray cap with a 0.5 mm diameter hole. Then, the resulting solid was dispersed in DMF and washed twice with DMF and ethanol. The final product was calcined in the presence of air at 250° C for 12 hours. Encapsulation efficiency was calculated based on the initial amount of NPs in the precursors solution (4, 8.5 and 12 mg for UiO-66@Au/CeO<sub>2</sub>-2.8, UiO-66@Au/CeO<sub>2</sub>-5.5 and UiO-66@Au/CeO<sub>2</sub>-7, respectively), the final mass of the

product after washing (144, 140 and 125 mg for UiO-66@Au/CeO<sub>2</sub>-2.8, UiO-66@Au/CeO<sub>2</sub>-5.5 and UiO-66@Au/CeO<sub>2</sub>-7, respectively) and the Au/CeO<sub>2</sub> content determined by ICP-OES.

## Synthesis of PVP-Stabilized Pd Nanoparticles

NaPdCl<sub>2</sub> (44 mg) was dissolved in 20 mL of ethylene glycol in the presence of 222 mg of PVP (MW = 55,000) in a three-neck round-bottomed flask. This solution was heated up to 180 °C for 10 minutes and, after cooling down to room temperature, 150 mL of acetone was added into it. Precipitated Pd NPs were then dispersed in DMF and washed twice with DMF by centrifugation. Finally, they were redispersed in 5 mL of DMF to give a colloidal solution of Pd NPs with a concentration of 0.8 mg/mL. The average size of synthesized Pd NPs was 3.3 ± 1.1 nm.

## Synthesis of UiO-66@Pd

127 mg of ZrCl<sub>4</sub>, 89 mg of BDC and 2 mL of PVP-stabilized Pd NPs solution with a concentration of 0.8 mg/mL were added to mixture of DMF (5 mL) and H<sub>2</sub>O (0.4 mL). The resulting mixture was injected into a coil flow reactor (inner diameter: 3 mm) at a feed rate of 2.4 mL·min<sup>-1</sup> at 115 °C. The resulting pre-heated solution was then spray dried at 180 °C and a flow rate of 336 mL·min<sup>-1</sup> using a B-290 Mini Spray Dryer (BUCHI Labortechnik) using a spray cap with a 0.5 mm diameter hole. The resulting solid was dispersed in DMF and washed twice times with DMF and ethanol. Then, it was dispersed in ethanol and stirred at room temperature overnight and precipitated by centrifugation. The process was repeated one more time with ethanol. The final product was dried for 12 hours at 160 °C under vacuum. Inductively Coupled Plasma – Optical Emission Spectroscopy (ICP-OES) showed a Pd content of 2.3 w.t. %.

## Catalytic CO Oxidation Study

The catalytic oxidation of CO was carried out in a fixed bed column reactor with dimensions of 9.0 cm in length and 0.5 cm in inner diameter set in a controlled temperature oven. 50 mg of the catalyst was packed into the column, and a mixture of gases consisting of 1 % CO, 21 % O<sub>2</sub> and 78 % N<sub>2</sub> was passed through the column reactor at a fixed flow rate of 100 mL/min. After that, the catalyst was heated up to the desired temperature and maintained until a steady state was achieved. Within this interval of time, set of samples of the outlet gas were withdrawn and analyzed to determine the CO<sub>2</sub> produced. A Hewlett-Packard, GC-5890, gas chromatograph equipped with TCD detector using an Agilent J&W GC column, HP-Plot Q, was used to determine the CO<sub>2</sub>. The produced CO<sub>2</sub> gas was determined based on the integration area of the CO<sub>2</sub> peak using the relevant calibration curve. The process of the effluent gas measurements was continued until 100 %

conversion of CO. Activation energy was calculated using the rate method [M. A. Shalabi, B. H. Harji, C. N. Kenney, *J. Chem. Technol. Biotechnol.*, 1996, **65**, 317–324], from which a value of 40.2 kJ/mol (with a  $R^2$  value of 0.98) was determined.

## Characterization

X-ray powder diffraction (XRPD) patterns were collected on an X'Pert PRO MPDP analytical diffractometer (Panalytical) at 45 kV, 40 mA using CuK $\alpha$  radiation (1.5419 Å). Nitrogen adsorption and desorption measurements were done at 77° K using an Autosorb-IQ-AG analyser (Quantachrome Instruments). Field-Emission Scanning Electron Microscopy (FE-SEM) images were collected on a FEI Magellan 400L scanning electron microscope at an acceleration voltage of 1.0–2.0 kV, using aluminum as support. High-angle annular dark-field scanning transmitted electron microscopy (HAADF-STEM) images were obtained with a FEI Tecnai G2 F20 at 200 kV. A Hewlett-Packard, GC-5890, gas chromatograph equipped with TCD detector using an Agilent J&W GC column, HP-Plot Q, was used to determine CO<sub>2</sub>. Inductively Coupled Plasma – Optical Emission Spectroscopy (ICP-OES) measurements were performed using an ICP-OES Perkin-Elmer, model Optima 4300DV.

**Figure S1.** (a,b) HAADF-STEM and (c) XRPD pattern of core-shell Au/CeO<sub>2</sub> NPs (black) in comparison to simulate patterns of Au (red) and CeO<sub>2</sub> (blue). Histogram of the (d) overall diameter of Au/CeO<sub>2</sub>, (e) Au core and (f) CeO<sub>2</sub> shell.

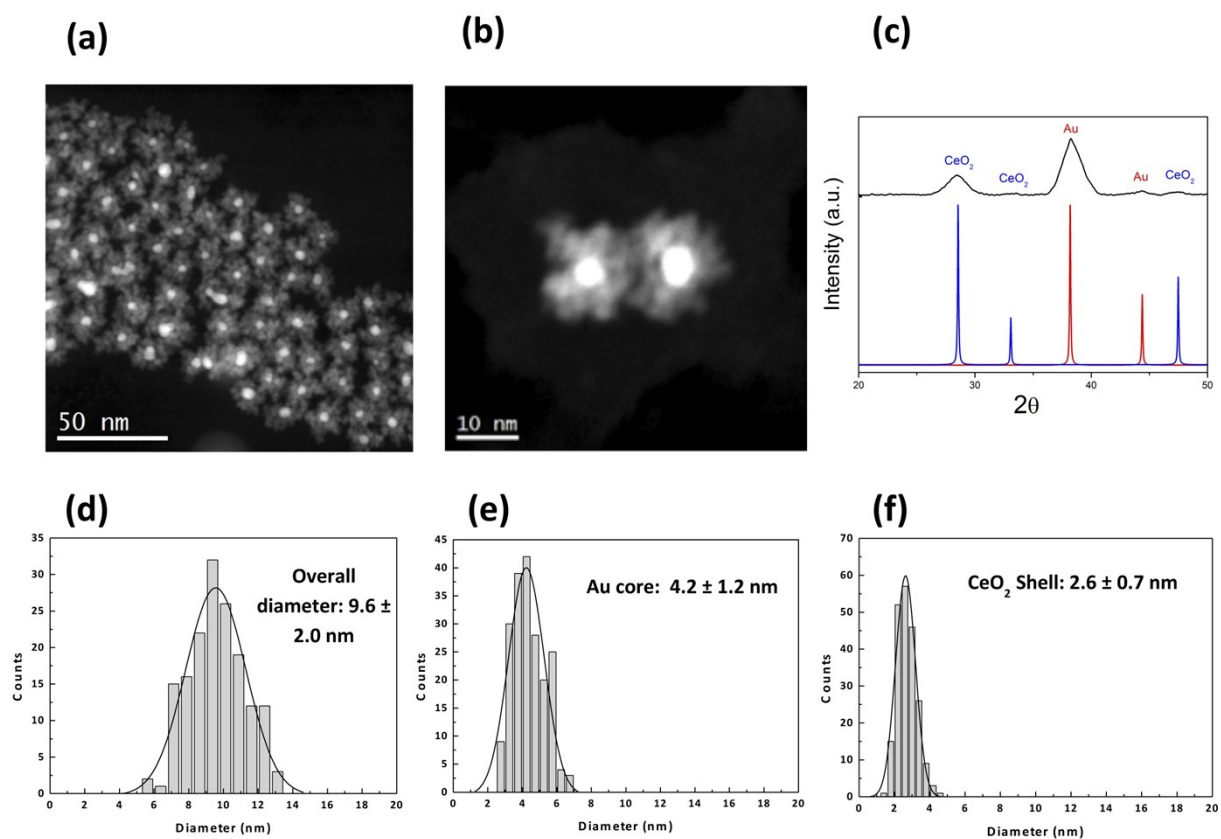

**Figure S2.** (a) HAADF-STEM and (b) XRPD pattern of UiO-66@Au (red) in comparison to simulated pattern of UiO-66 (black). Note here that, when we used  $\text{ZrCl}_4$  as the metal salt to synthesize UiO-66@Au/ $\text{CeO}_2$ , the resulting acidic precursors solution ( $\text{pH} \sim 1$ ) at high temperature caused dissolution of  $\text{CeO}_2$  in the process. As a result, a composite made of large Au NPs encapsulated into UiO-66 beads was produced. This phenomenon was confirmed by ICP-OES from which a Au content of 2.6 w.t. % and a Ce content of 0.02 w.t. % were found.

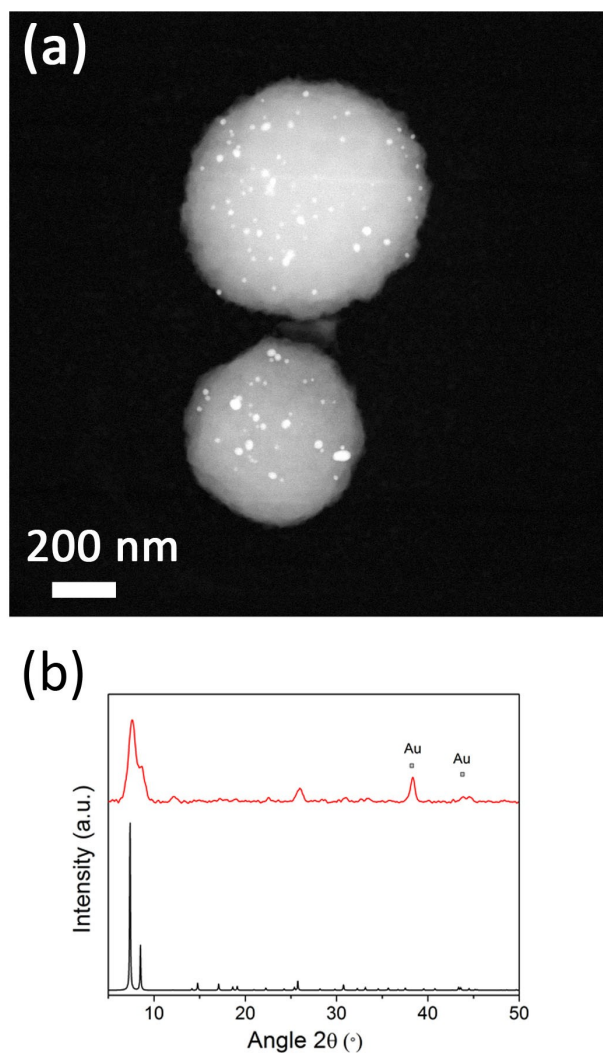

**Figure S3.** N<sub>2</sub> sorption isotherms collected at 77 K for (a) UiO-66@Au/CeO<sub>2</sub>-2.8, (b) UiO-66@Au/CeO<sub>2</sub>-5.5 and (c) UiO-66@Au/CeO<sub>2</sub>-7. In this latter case, it is shown the isotherms collected before and after three temperature-programmed cycles and 50 hours of continuous CO conversion.

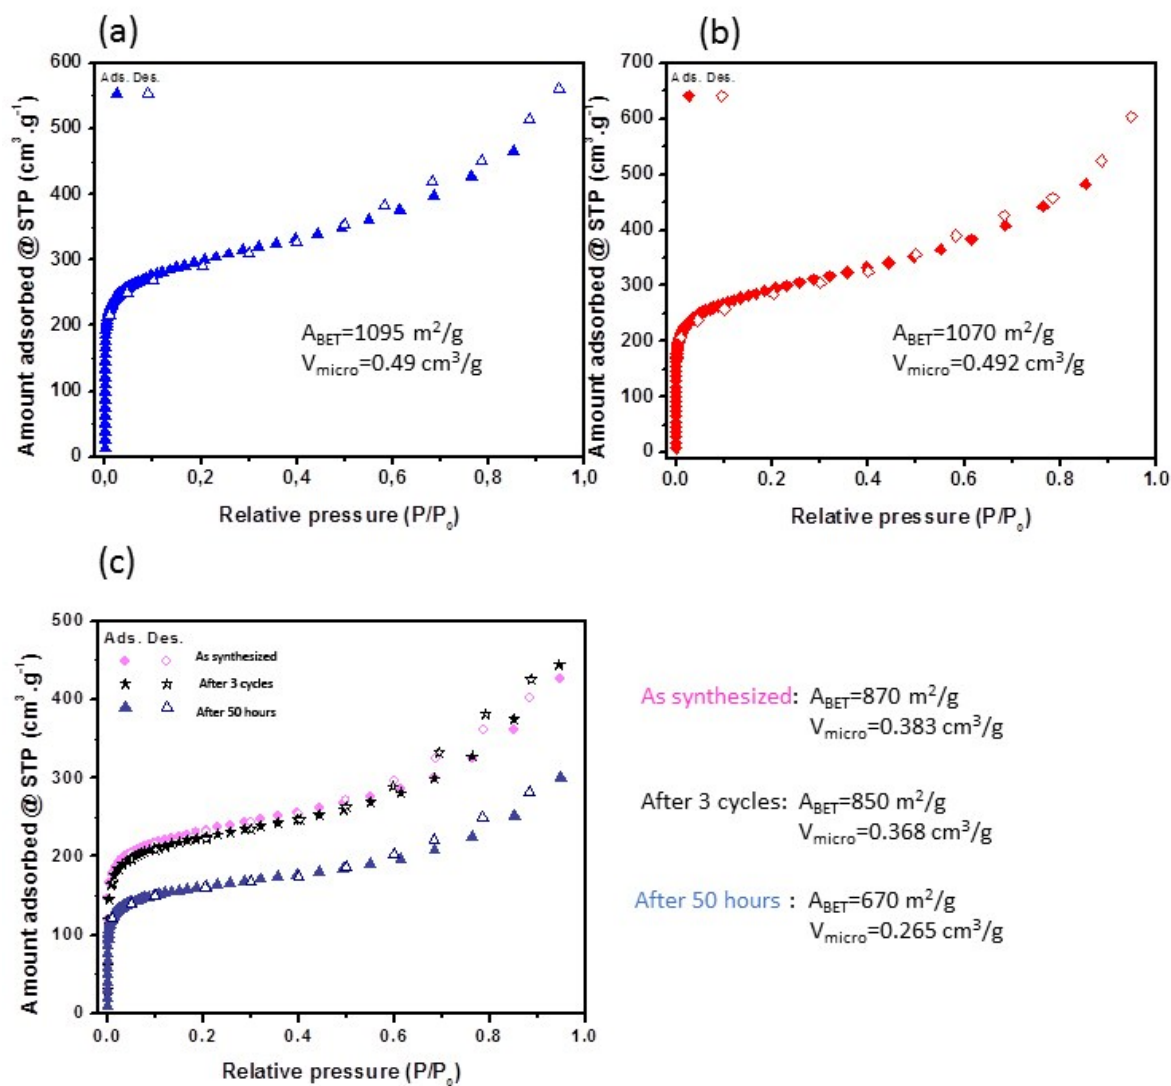

**Figure S4.** CO conversion rate as a function of reaction temperature for pristine UiO-66 beads.

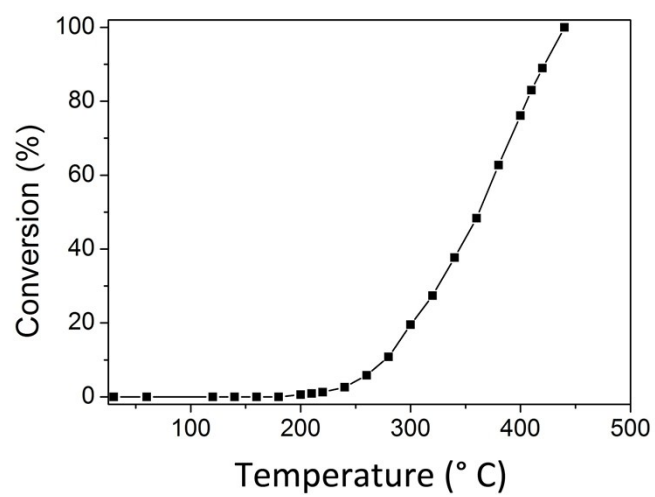



**Figure S5.** XRPD pattern of UiO-66@Au/CeO<sub>2</sub> synthesized with 16 ml of Au/CeO<sub>2</sub> NPs solution (red) in comparison to simulated pattern of UiO-66 (black).

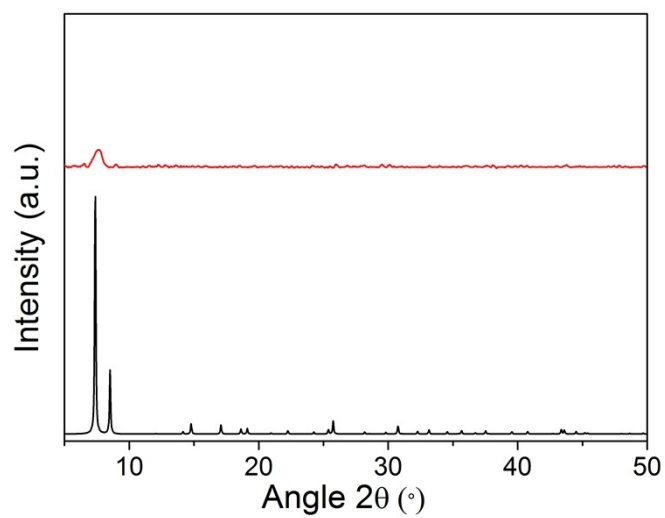

**Figure S6.** Stability test. (a,b) FE-SEM and (c) HAADF-STEM of UiO-66@Au/CeO<sub>2</sub>-7 after three temperature-programmed cycles. (d,e) FE-SEM and (f) HAADF-STEM of UiO-66@Au/CeO<sub>2</sub>-7 after 50 hours of continuous CO conversion.

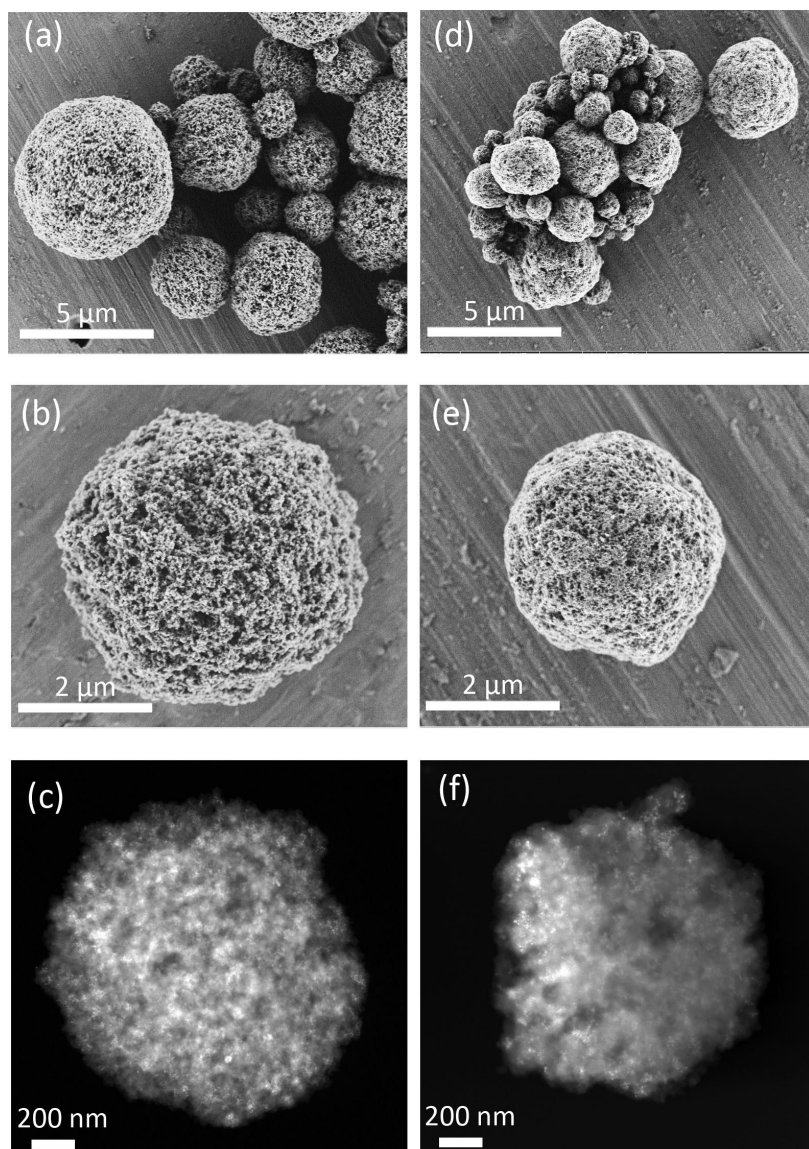

**Figure S7.** (a) HAADF-STEM, (b) FE-SEM and (c) XPDR pattern of UiO-66@Pd (red) in comparison to simulated pattern of UiO-66(black). (d) CO conversion rate as a function of reaction temperature for UiO-66@Pd,  $T_{50} = 164\text{ }^{\circ}\text{C}$  and  $T_{100} = 180\text{ }^{\circ}\text{C}$ .

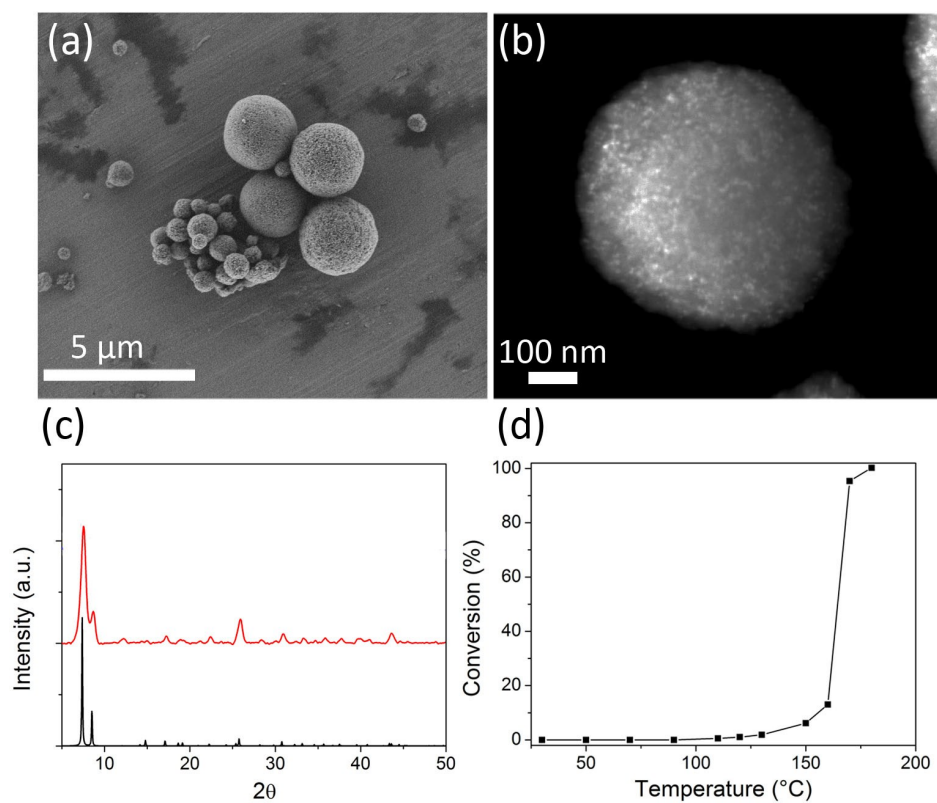

**Table S1.** Summary of catalysts based on Au NPs and their corresponding TOF values.

| Material                                                     | T(°C) | Au NP size (nm) | TOF (h <sup>-1</sup> ) | Reference |
|--------------------------------------------------------------|-------|-----------------|------------------------|-----------|
| UiO-66@Au/CeO <sub>2</sub>                                   | 30    | 5               | 10                     | This work |
|                                                              | 50    | 5               | 39                     |           |
|                                                              | 75    | 5               | 106                    |           |
|                                                              | 100   | 5               | 204                    |           |
| 2.32Au/ZnOx/CeO <sub>2</sub> -Al <sub>2</sub> O <sub>3</sub> | 25    | 5               | 1188                   | [1]       |
| 1.9Au/0.5ZnO/CeAl                                            | 25    | 5               | 1584                   |           |
| 1.82Au/1ZnO/Al                                               | 25    | 5               | 396                    |           |
| 1.7Au/1ZnO/CeAl                                              | 25    | 5               | 1836                   |           |
| 1.99Au/1.5ZnO/CeAl                                           | 25    | 5               | 1548                   |           |
| 1.57Au/0.5Fe <sub>2</sub> O <sub>3</sub> /CeAl               | 25    | 5.7             | 1152                   |           |
| 1.91 Au/1 Fe <sub>2</sub> O <sub>3</sub> /Al                 | 25    | 5               | 72                     |           |
| 1.26 Au/1 Fe <sub>2</sub> O <sub>3</sub> /CeAl               | 25    | 18              | 4356                   |           |
| Au/1.5 Fe <sub>2</sub> O <sub>3</sub> /CeAl                  | 25    | 21              | 1368                   |           |
| Pt/SiO <sub>2</sub>                                          | 177   | 10              | 36                     | [2]       |
| Al <sub>2</sub> O <sub>3</sub> -supported Pt                 | 250   | 10              | 720                    | [3]       |
| Al <sub>2</sub> O <sub>3</sub> -supported Pd                 | 250   | 10              | 14400                  |           |
| Al <sub>2</sub> O <sub>3</sub> -supported Rh                 | 250   | 10              | 21600                  |           |
| Au/TiO <sub>2</sub> /Mo(100)                                 | 27    | 2.4             | 720*                   | [4]       |

\*at a reaction time of 100min

[1] T. Ramirez Reina, S. Ivanova, M. I. Dominguez, M. A. Centeno, J. A. Odriozola, *Applied Catalysis A: General*, 2012, **419–420**, 58–66.

[2] N. W. Cant, *J. Catal*, 1980, **62**, 173-175.

[3] Y. F. Yu Yao, *J. Catal*, 1984, **87**, 152-162.

[4] A. K. Santra, D.W. Goodman, *Electrochimica Acta*, 2002, 47, **22-23**, 3595-3609.
